# Supplementary material
Source: PubMed Central journal article supplement (PMC1560926)

*Bienerfia*

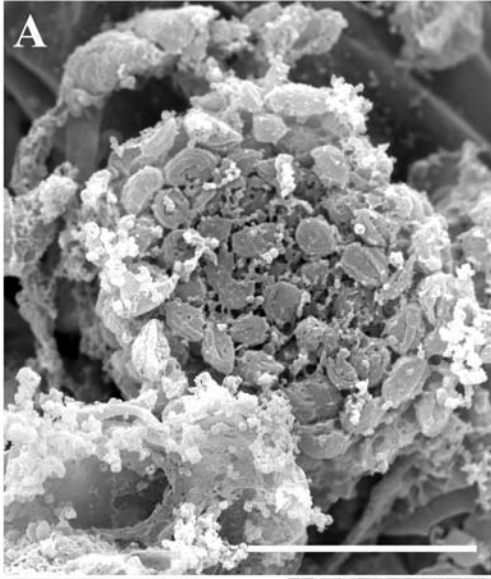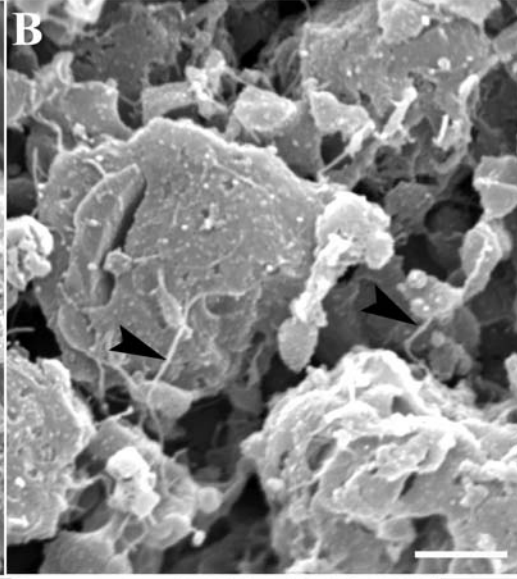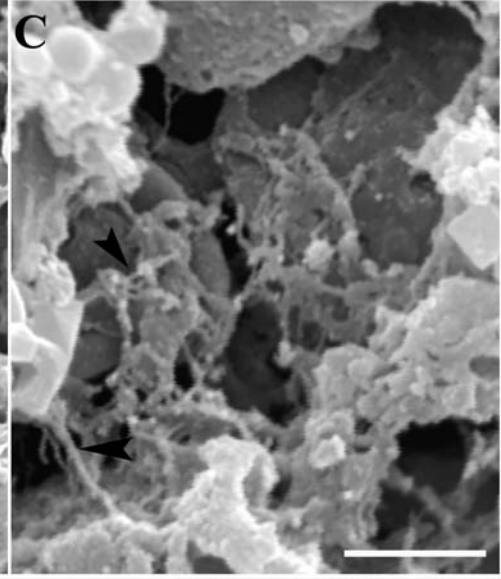

*S. aralocaspica*

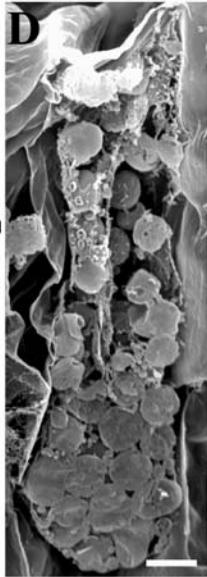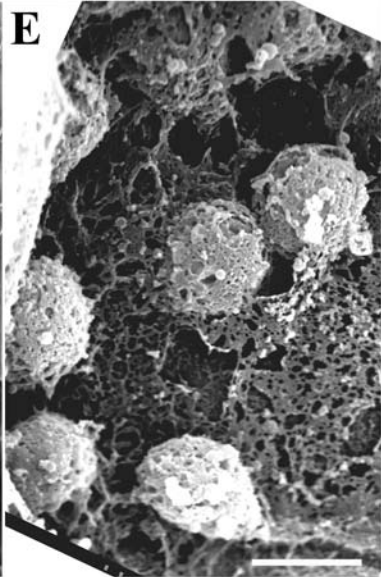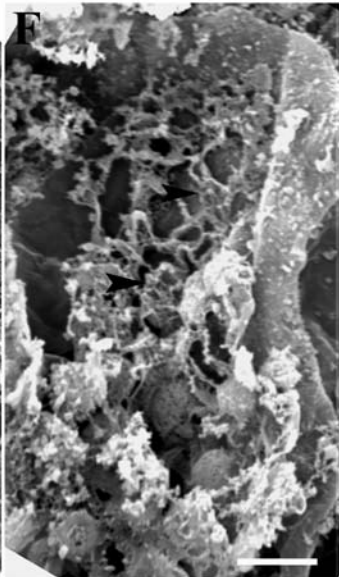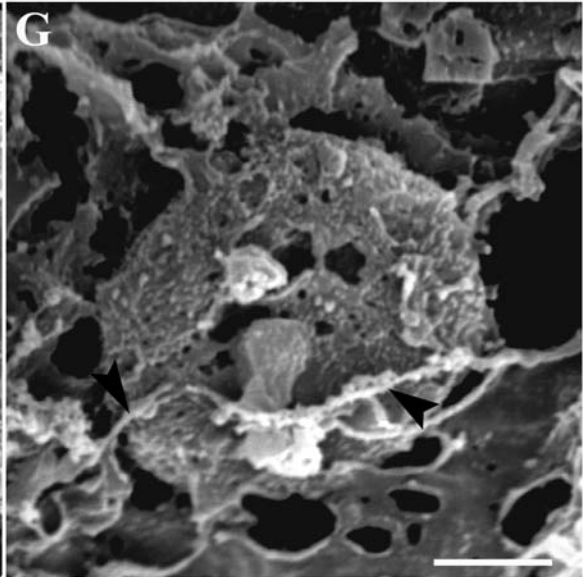

Supplement: plntcell_tpc.105.036186_1.pdf [file plntcell_tpc.105.036186_1.pdf]

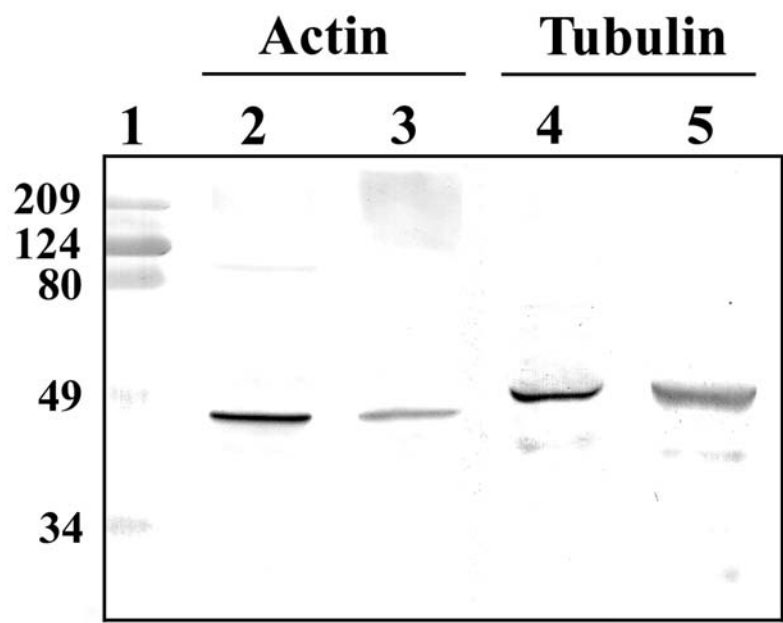

Supplement: plntcell_tpc.105.036186_2.pdf [file plntcell_tpc.105.036186_2.pdf]

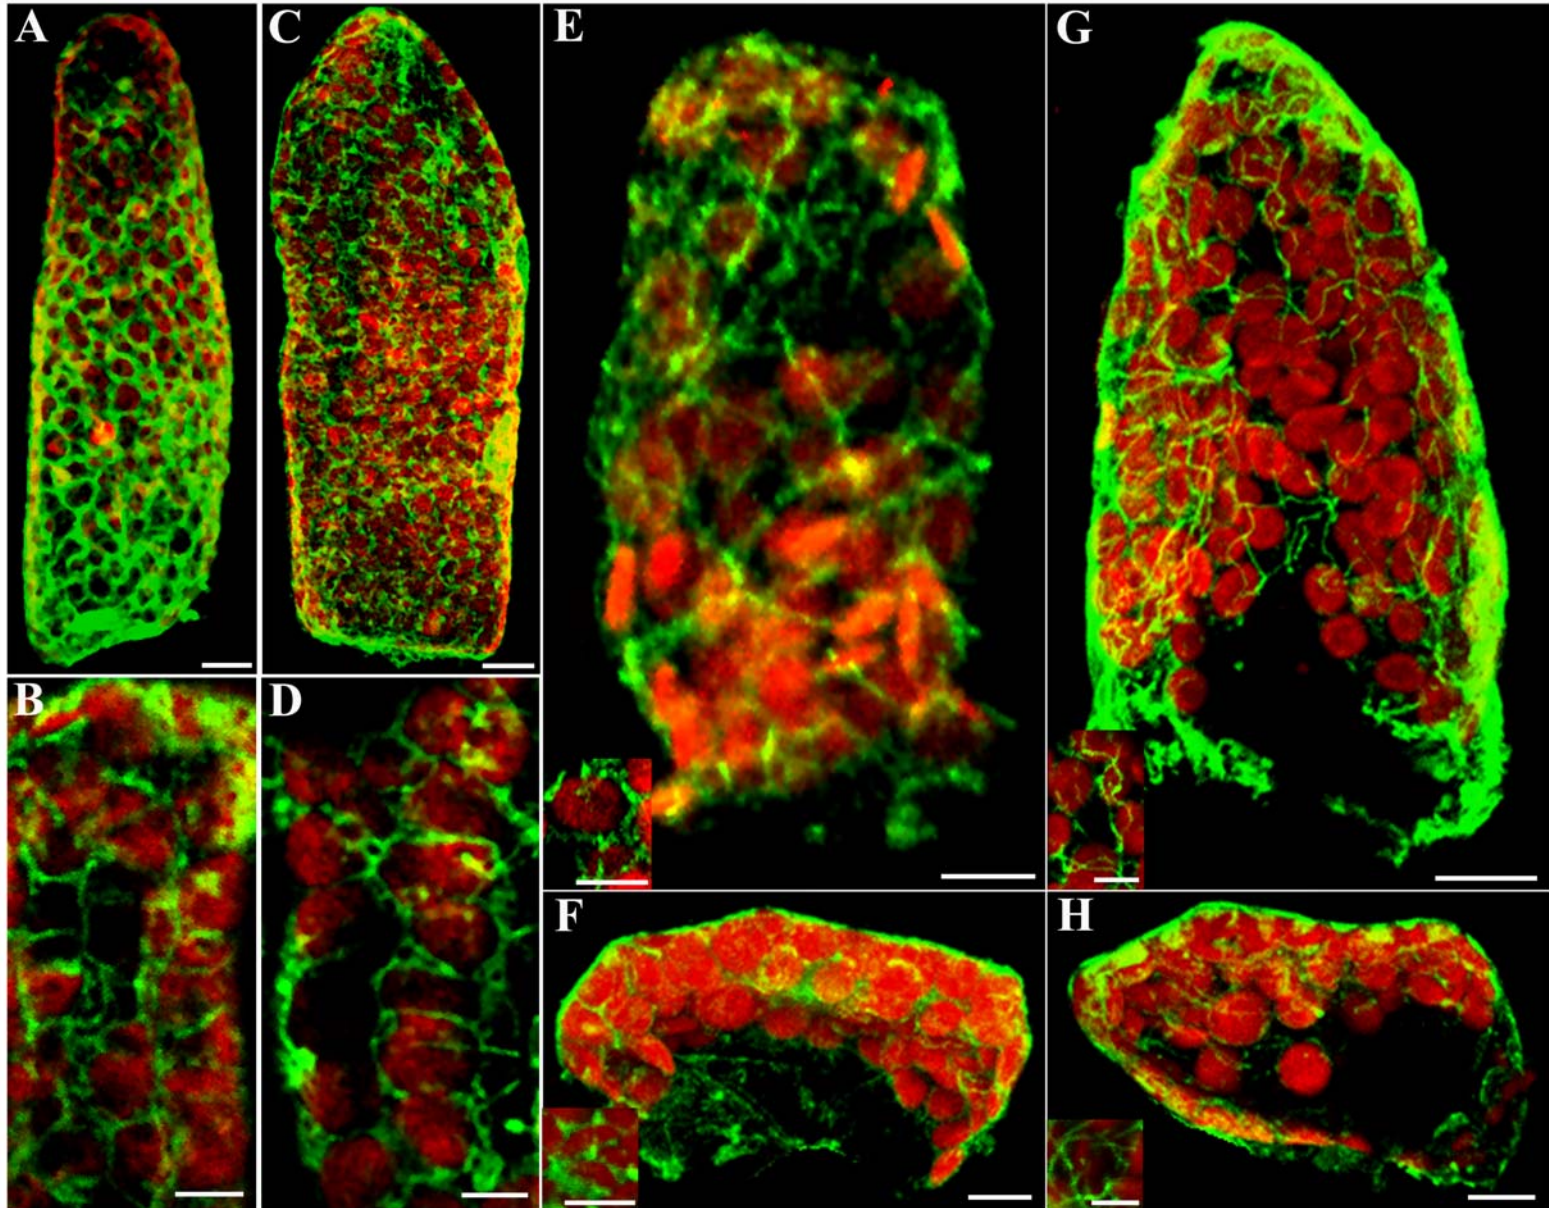

Supplement: plntcell_tpc.105.036186_3.pdf [file plntcell_tpc.105.036186_3.pdf]

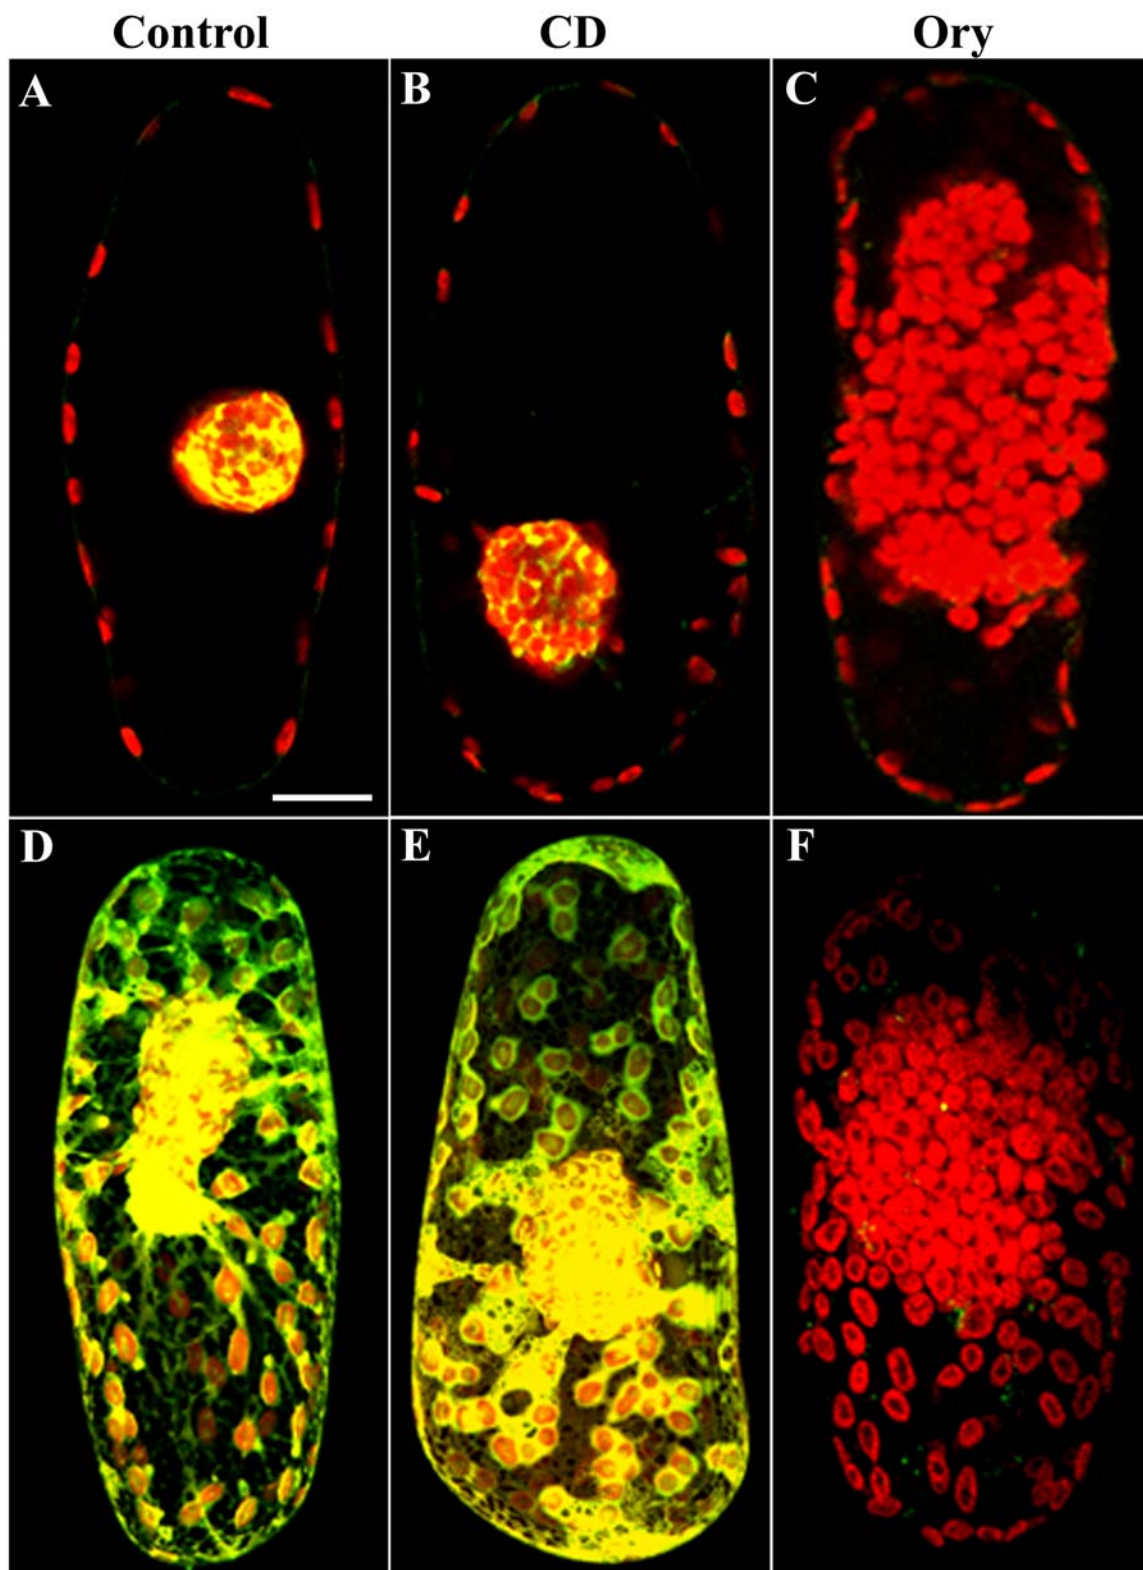

Supplement: plntcell_tpc.105.036186_4.pdf [file plntcell_tpc.105.036186_4.pdf]
